# Supplementary material for: Sunlight-induced effective heterogeneous photocatalytic decomposition of aqueous organic pollutants to CO2 assisted by a CO2 sorbent, amine-containing mesoporous silica
Source: Royal Society of Chemistry journal article supplement (doi:10.1039/c2cc31981k), 2012-01-01
Supplement: c2cc31981k.pdf [file c2cc31981k.pdf]

## Electronic Supplementary Information

The XRD patterns, N<sub>2</sub> adsorption/desorption isotherms and <sup>29</sup>Si MAS NMR spectra of SBA-15 before and after the silylation with 3-(aminopropyl)trimethoxysilane are shown in Fig. S1, Fig. S2 and Fig. S3, respectively. These results confirmed that aminopropyl silyl group was successfully immobilized on the pore surface of SBA-15 with the original pore structure maintained.

Fig. S4 depicts the TG-DTA curves of the silylated SBA-15 synthesized with varied amount of the added silane coupling reagent (1.2NH<sub>2</sub>-SBA and 1.9NH<sub>2</sub>-SBA). From the results, the successful formation of amine containing SBA-15 with controlled amount of the attached amine was shown.

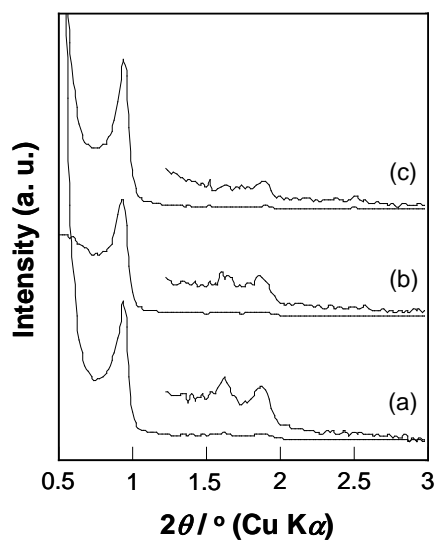

**Fig. S1** XRD patterns of (a) SBA-15, (b) 1.2NH<sub>2</sub>-SBA and (c) 1.9NH<sub>2</sub>-SBA.

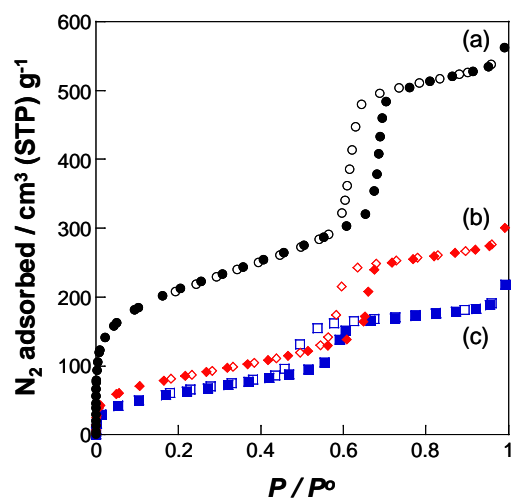

**Fig. S2** N<sub>2</sub> adsorption (filled)/desorption (open) isotherms of (a) SBA-15, (b) 1.2NH<sub>2</sub>-SBA and (c) 1.9NH<sub>2</sub>-SBA.

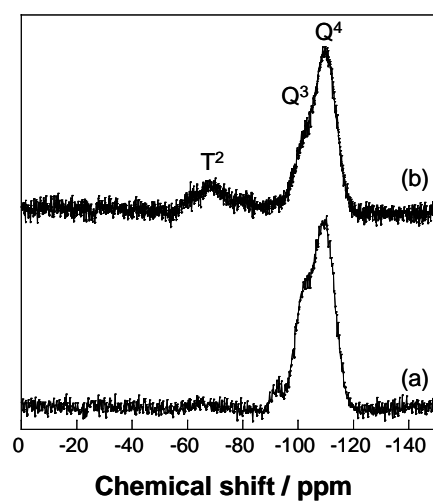

**Fig. S3**  $^{29}\text{Si}$  MAS NMR spectra of (a) SBA-15 and (b) 1.2NH<sub>2</sub>-SBA.

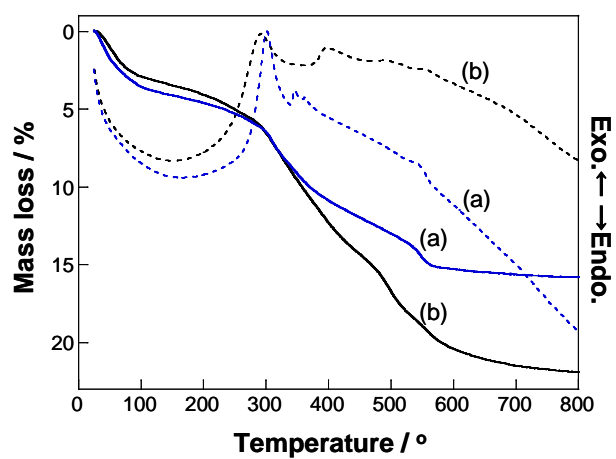

**Fig. S4** TG (solid)-DTA (dashed) curves of (a) 1.2NH<sub>2</sub>-SBA and (b) 1.9NH<sub>2</sub>-SBA.
